# Supplementary material for: Tri- and hexanuclear heterometallic Ni(ii)–M(ii) (M = Ca, Sr and Ba) bis(salamo)-type complexes: synthesis, structure and fluorescence properties
Source: Royal Society of Chemistry journal article supplement (doi:10.1039/c7ra07826a), 2017-01-01
Supplement: c7ra07826a1.pdf [file c7ra07826a1.pdf]

## Supporting Information

### **Tri- and hexanuclear heterometallic Ni(II)-M(II) (M = Ca, Sr and Ba) bis(salamo)-type complexes: Syntheses, structures and fluorescence properties**

Xiu-Yan Dong,<sup>a</sup> Xiao-Yan Li,<sup>a</sup> Ling-Zhi Liu,<sup>a</sup> Han Zhang,<sup>a</sup> Yu-Jie Ding<sup>b</sup> and Wen-Kui Dong<sup>\*a</sup>

---

<sup>a</sup> School of Chemical and Biological Engineering, Lanzhou Jiaotong University, Lanzhou, Gansu 730070, PR China. E-mail: dongwk@126.com

<sup>b</sup> School of Biological & Chemical Engineering, Anhui Polytechnic University, Wuhu 241000, PR China.

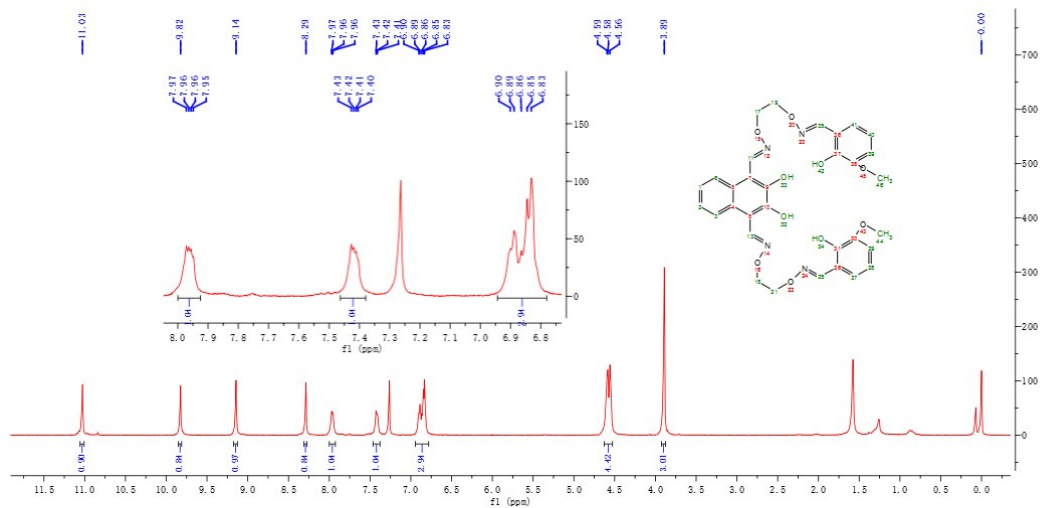

<sup>1</sup>H NMR (400 MHz, CDCl<sub>3</sub>) δ 11.03 (s, 2H), 9.82 (s, 2H), 9.14 (s, 2H), 8.29 (s, 2H), 7.97 (q, *J* = 3.2 Hz, 2H), 7.41 (q, *J* = 6.0, 2.9 Hz, 2H), 7.06 – 6.68 (m, 6H), 4.58 (t, 8H), 3.89 (s, 6H).

**Fig. S1** <sup>1</sup>H NMR spectra of ligand H<sub>4</sub>L(CDCl<sub>3</sub>, 400 MHz).

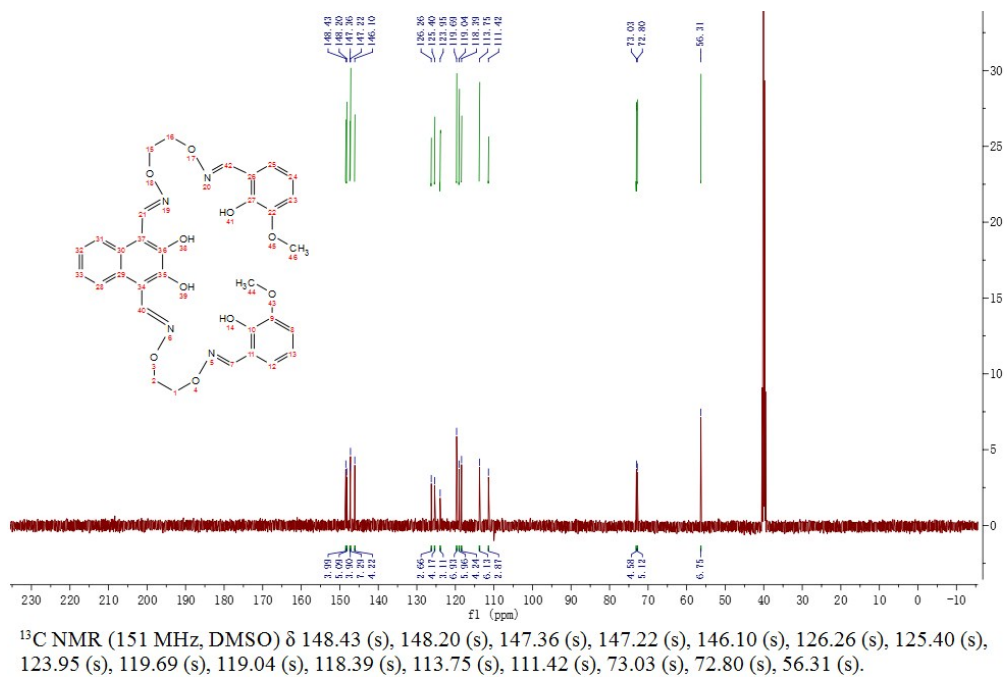

**Fig. S2** <sup>13</sup>C NMR spectra of ligand H<sub>4</sub>L(DMSO, 151 MHz).

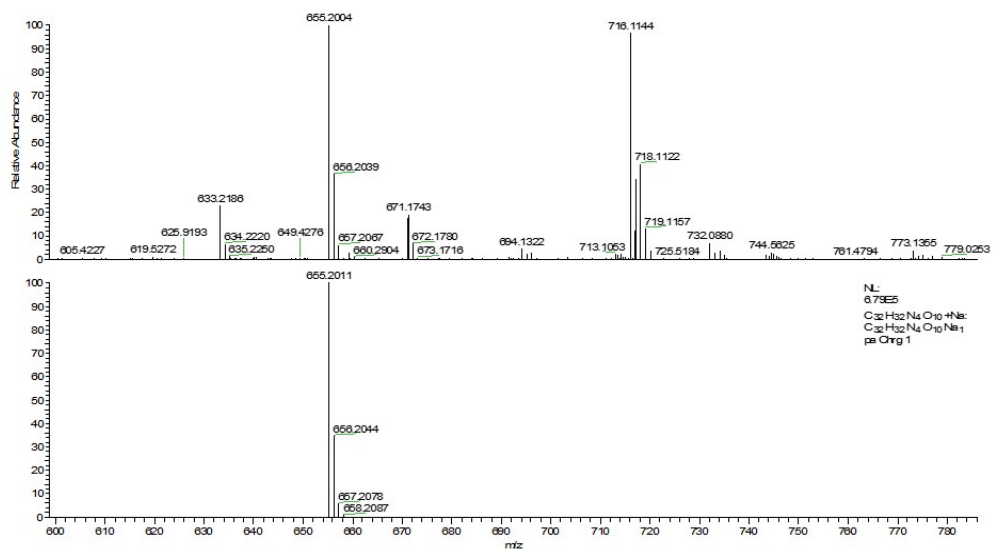

**Fig. S3** The HRMS of ligand H<sub>4</sub>L.

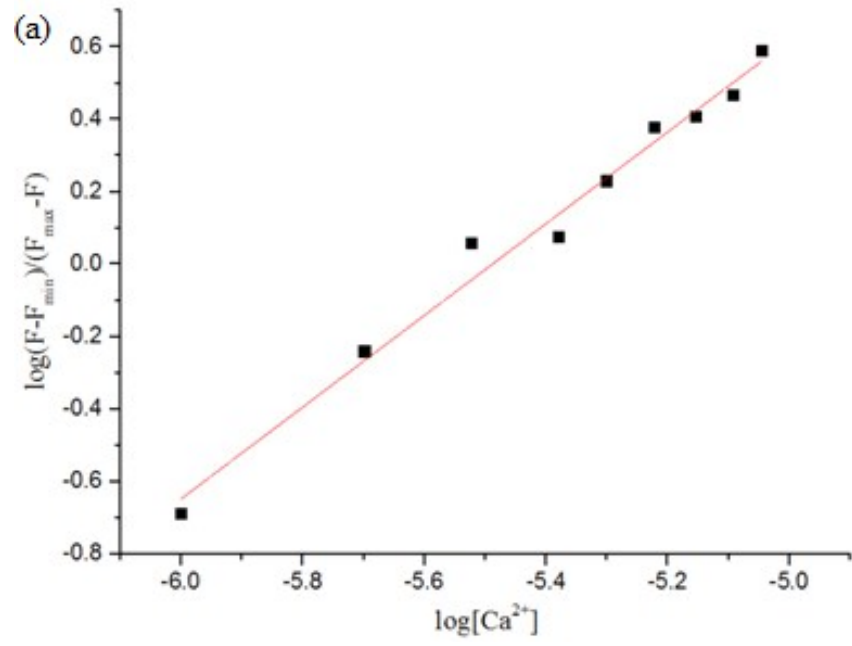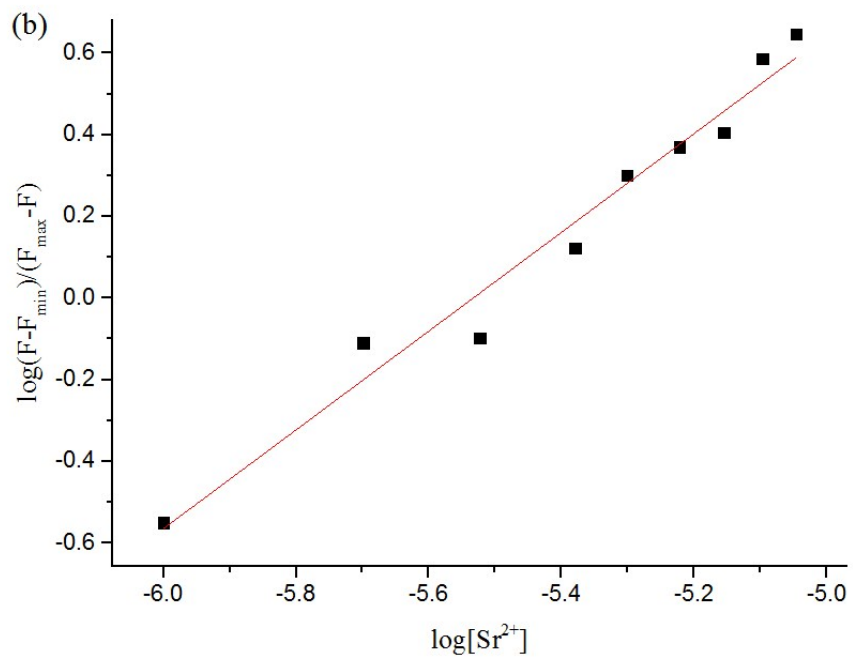

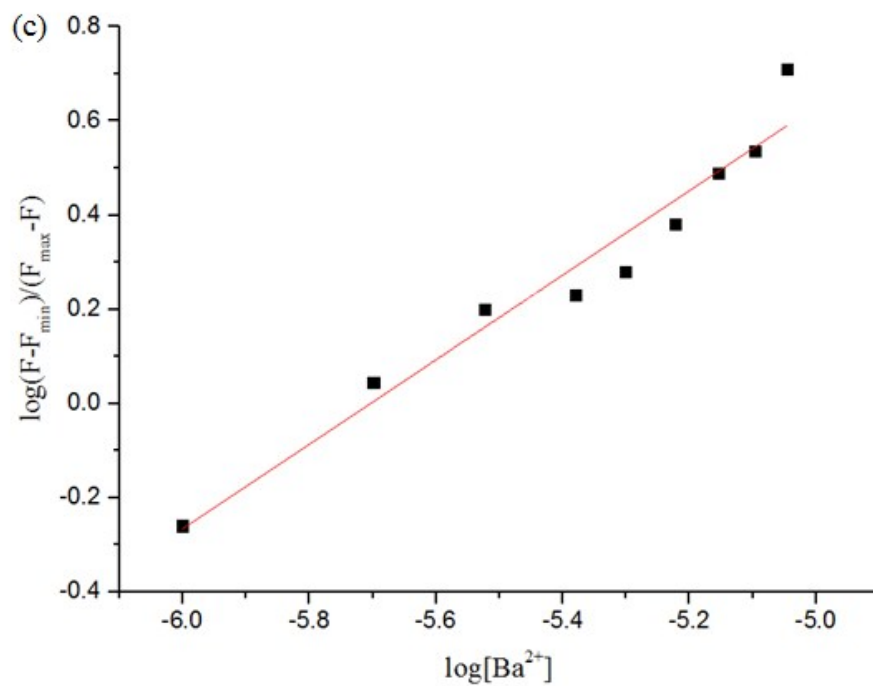

**Fig. S4** Linear fitting of Ni(II) complex to  $Ca^{2+}$ ,  $Sr^{2+}$  and  $Ba^{2+}$  binding constant, respectively.
